# Supplementary material
Source: PubMed Central journal article supplement (PMC7080217)
Supplement: Supp_TableS1.pdf [file Supp_TableS1.pdf]

## Supplementary Data

SUPPLEMENTARY TABLE S1. GENE MUTATION  
FREQUENCY IN FAMILIAL ADENOMATOUS POLYPOSIS  
AND SPORADIC PAPILLARY THYROID CANCER

| <i>Gene</i>     | <i>PTC in FAP</i><br>(n=12) | <i>TCGA of PTC</i><br>(n=496) | <i>AACR GENIE</i><br><i>PTC</i> (n=560) |
|-----------------|-----------------------------|-------------------------------|-----------------------------------------|
| <i>BRAF</i>     | 17%                         | 60%                           | 65%                                     |
| <i>RET</i>      | 8%                          | 7%                            | 4%                                      |
| <i>APC</i>      | 58%                         | 1%                            | 3%                                      |
| <i>CUX1</i>     | 25%                         | 1%                            | 3%                                      |
| <i>KMT2C</i>    | 33%                         | 1%                            | 2%                                      |
| <i>TTN</i>      | 50%                         | 3%                            | 0                                       |
| <i>TG</i>       | 8%                          | 3%                            | 0                                       |
| <i>OBSCN</i>    | 33%                         | 1%                            | 0                                       |
| <i>MUC5B</i>    | 25%                         | 1%                            | 0                                       |
| <i>EVPL</i>     | 25%                         | 1%                            | 0                                       |
| <i>PKHD1</i>    | 25%                         | 1%                            | 0                                       |
| <i>DYNC1H1</i>  | 25%                         | 0.7%                          | 0                                       |
| <i>DNAH10</i>   | 25%                         | 0.7%                          | 0                                       |
| <i>VPS13D</i>   | 25%                         | 0.7%                          | 0                                       |
| <i>DST</i>      | 25%                         | 0.5%                          | 0                                       |
| <i>PLXNB1</i>   | 25%                         | 0.5%                          | 0                                       |
| <i>LAMA5</i>    | 25%                         | 0.5%                          | 0                                       |
| <i>TRANK1</i>   | 25%                         | 0.5%                          | 0                                       |
| <i>PRDM15</i>   | 25%                         | 0.5%                          | 0                                       |
| <i>TNRC18</i>   | 25%                         | 0.5%                          | 0                                       |
| <i>PCLO</i>     | 33%                         | 0.2%                          | 0                                       |
| <i>MKI67</i>    | 25%                         | 0.2%                          | 0                                       |
| <i>FLNA</i>     | 25%                         | 0.2%                          | 0                                       |
| <i>VCAN</i>     | 25%                         | 0.2%                          | 0                                       |
| <i>XRNI</i>     | 25%                         | 0.2%                          | 0                                       |
| <i>DSCAM</i>    | 25%                         | 0.2%                          | 0                                       |
| <i>RYR3</i>     | 25%                         | 0.2%                          | 0                                       |
| <i>KMT2D</i>    | 58%                         | 0                             | 0                                       |
| <i>HSPG2</i>    | 33%                         | 0                             | 0                                       |
| <i>MEGF8</i>    | 33%                         | 0                             | 0                                       |
| <i>MKL1</i>     | 25%                         | 0                             | 0                                       |
| <i>ALKBH7</i>   | 25%                         | 0                             | 0                                       |
| <i>CACNA1H</i>  | 25%                         | 0                             | 0                                       |
| <i>CCDC168</i>  | 25%                         | 0                             | 0                                       |
| <i>FOXD4L5</i>  | 25%                         | 0                             | 0                                       |
| <i>HECTD1</i>   | 25%                         | 0                             | 0                                       |
| <i>PLD1</i>     | 25%                         | 0                             | 0                                       |
| <i>SNRPA1</i>   | 25%                         | 0                             | 0                                       |
| <i>OTOF</i>     | 25%                         | 0                             | 0                                       |
| <i>RAP1GAP2</i> | 25%                         | 0                             | 0                                       |
| <i>SETD1B</i>   | 25%                         | 0                             | 0                                       |
| <i>CDC42BPG</i> | 25%                         | 0                             | 0                                       |
| <i>BOD1L1</i>   | 25%                         | 0                             | 0                                       |
| <i>IGFN1</i>    | 25%                         | 0                             | 0                                       |

Mutation frequencies of genes mutated in at least 25% of the sequenced PTCs are listed.

AACR-GENIE, American Association for Cancer Research Genomics Evidence Neoplasia Information Exchange; FAP, familial adenomatous polyposis, *n*, number, PTC, papillary thyroid cancer; TCGA, The Cancer Genome Research Atlas.
