# Supplementary material
Source: PubMed Central journal article supplement (PMC7080217)
Supplement: Supp_TableS2.pdf [file Supp_TableS2.pdf]

SUPPLEMENTARY TABLE S2. GERMLINE VARIANTS IN FAMILIAL PAPILLARY THYROID CANCER-ASSOCIATED GENES

| <i>Patient no.</i> | <i>Gene</i>    | <i>Position</i> | <i>Effect</i> | <i>Alteration</i> | <i>gnomAD AF</i> | <i>rs ID</i> |
|--------------------|----------------|-----------------|---------------|-------------------|------------------|--------------|
| 1                  | <i>FGD6</i>    | 12:95602805     | Arg752Leu     | C → A             | 0.00849          | rs117209224  |
| 4                  | <i>SMARCD3</i> | 7:150972217     | Pro8Thr       | G → T             | 0.00292          | rs140745398  |
| 4                  | <i>IDE</i>     | 10:94291530     | Lys212Asn     | T → A             | 0.00132          | rs116003953  |
| 4                  | <i>NFRKB</i>   | 11:129752394    | Pro345His     | G → T             | 0.00044          | rs116056970  |
| 4                  | <i>RNF169</i>  | 11:74459939     | Gly5Asp       | G → A             | 0.00149          | rs189351853  |
| 4                  | <i>RNF213</i>  | 17:78263495     | Ala373Gly     | C → G             | 0.00200          | rs114454593  |
| 4                  | <i>RNF213</i>  | 17:78319966     | Gly2660Arg    | G → A             | 0.00175          | rs116594105  |
| 4                  | <i>RNF213</i>  | 17:78333998     | Asp3780Gly    | A → G             | 0.00272          | rs115808000  |
| 5                  | <i>AGK</i>     | 7:141341124     | Thr268Asn     | C → A             | 0.00100          | rs142779190  |
| 5                  | <i>NFRKB</i>   | 11:129739546    | His1125Arg    | T → C             | 0.00542          | rs143202036  |
| 5                  | <i>RNF213</i>  | 17:78313242     | Thr1741Ile    | C → T             | N/A              | N/A          |
| 6                  | <i>THBS4</i>   | 5:79368142      | Arg588Cys     | C → T             | 0.00003          | rs758548190  |
| 6                  | <i>NSMF</i>    | 9:140349727     | Arg45Gln      | C → T             | 0.00002          | rs745916712  |
| 7                  | <i>SALL4</i>   | 20:50406732     | Ser764Pro     | A → G             | 0.00423          | rs150549656  |
| 8                  | <i>AARS</i>    | 16:70286740     | Gly931Ser     | C → T             | 0.00759          | rs149377346  |
| 8                  | <i>RNF213</i>  | 17:78313281     | Thr1754Lys    | C → A             | 0.00433          | rs147868237  |
| 9                  | <i>FGD6</i>    | 12:95602805     | Arg752Leu     | C → A             | 0.00849          | rs117209224  |
| 9                  | <i>NAPB</i>    | 20:23358066     | Arg282Cys     | G → A             | N/A              | N/A          |
| 10                 | <i>CTDSP1</i>  | 2:219266388     | His57Asp      | C → G             | 0.00244          | rs141917217  |
| 12                 | <i>TDRD6</i>   | 6:46661479      | Val1872Leu    | G → T             | 0.00544          | rs142413497  |
| 12                 | <i>UNC79</i>   | 14:94009007     | Met397Val     | A → G             | 0.00002          | rs774399849  |
| 12                 | <i>P DPR</i>   | 16:70176193     | Arg458Cys     | C → T             | 0.00009          | rs374988246  |
| 12                 | <i>KDSR</i>    | 18:61022458     | Asp132Glu     | A → T             | 0.00001          | rs761321465  |

AF, allele frequency; N/A, not available.
